# Supplementary material
Source: Springer Nature journal article supplement (https://www.springermedizin.de/resource/supplementary/12916_2011_447_MOESM2_ESM.pdf/9599710)
Supplement: MOESM2 [file 9599710]

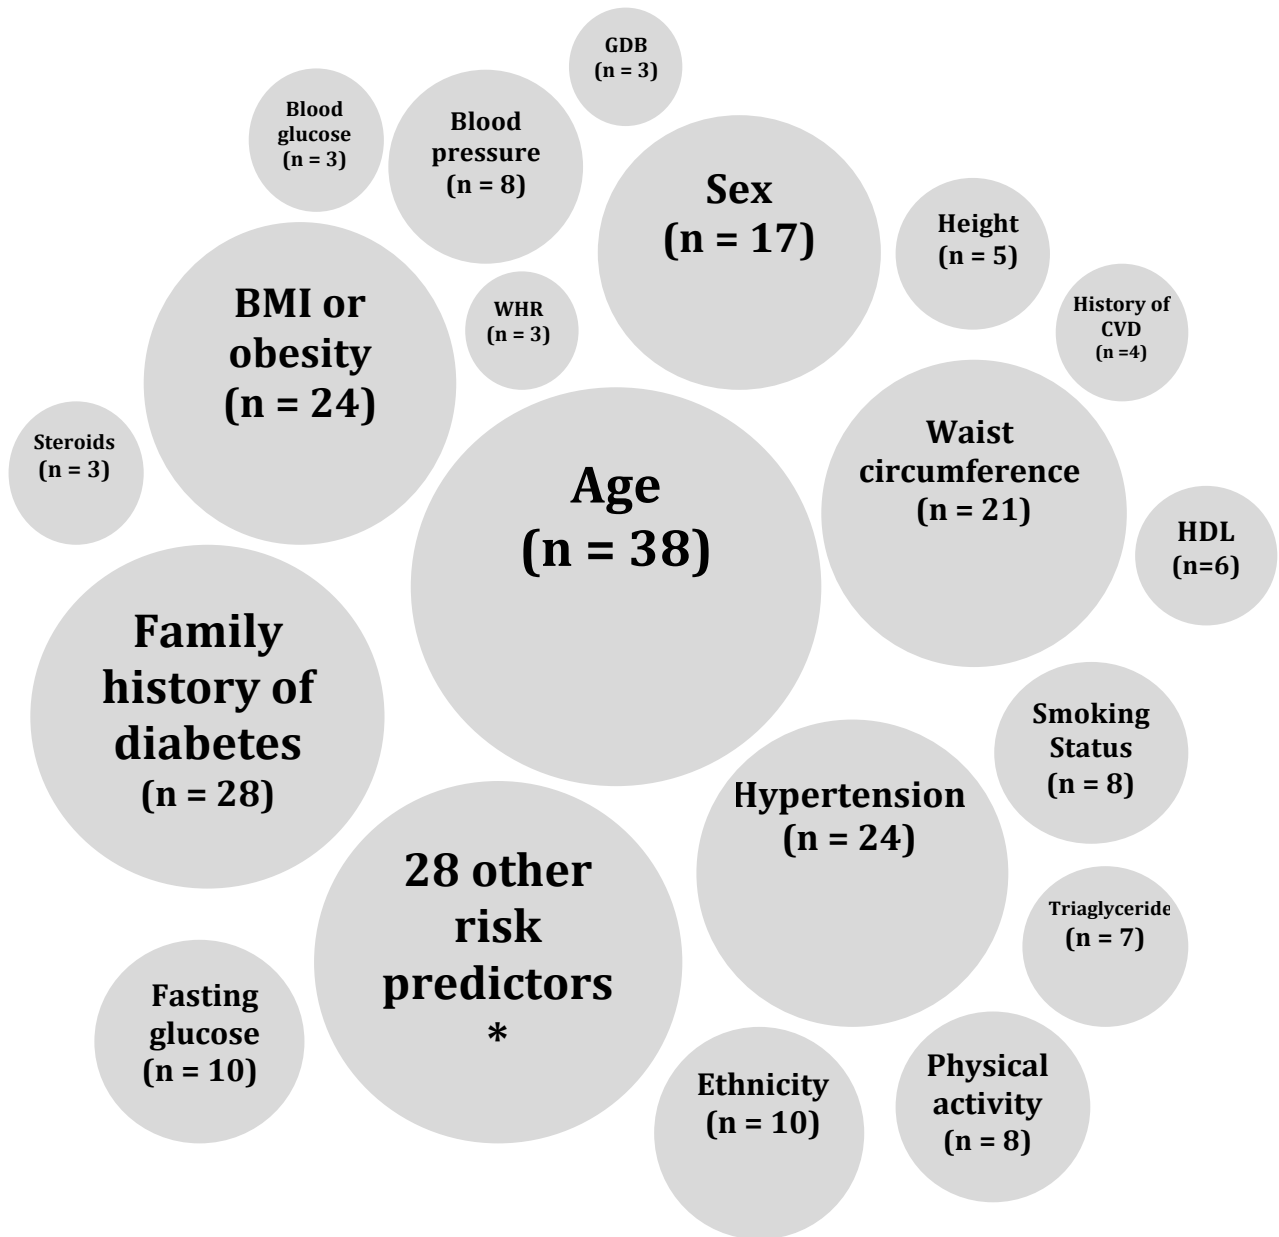

**GDB**  
(n = 3)

**Blood glucose**  
(n = 3)

**Blood pressure**  
(n = 8)

**Sex**  
(n = 17)

**Height**  
(n = 5)

**History of CVD**  
(n = 4)

**BMI or obesity**  
(n = 24)

**WHR**  
(n = 3)

**Steroids**  
(n = 3)

**Age**  
(n = 38)

**Waist circumference**  
(n = 21)

**HDL**  
(n = 6)

**Family history of diabetes**  
(n = 28)

**Smoking Status**  
(n = 8)

**Hypertension**  
(n = 24)

**28 other risk predictors**  
\*

**Triacylglyceride**  
(n = 7)

**Fasting glucose**  
(n = 10)

**Ethnicity**  
(n = 10)

**Physical activity**  
(n = 8)
